# Supplementary figures and images for: Metabolomic and Transcriptomic Analyses Reveal Association of Mature Fruit Pericarp Color Variation with Chlorophyll and Flavonoid Biosynthesis in Wax Gourd (Benincasa hispida)
Source: MDPI journal article supplement (doi:10.3390/agronomy12092045), 2022-08-27

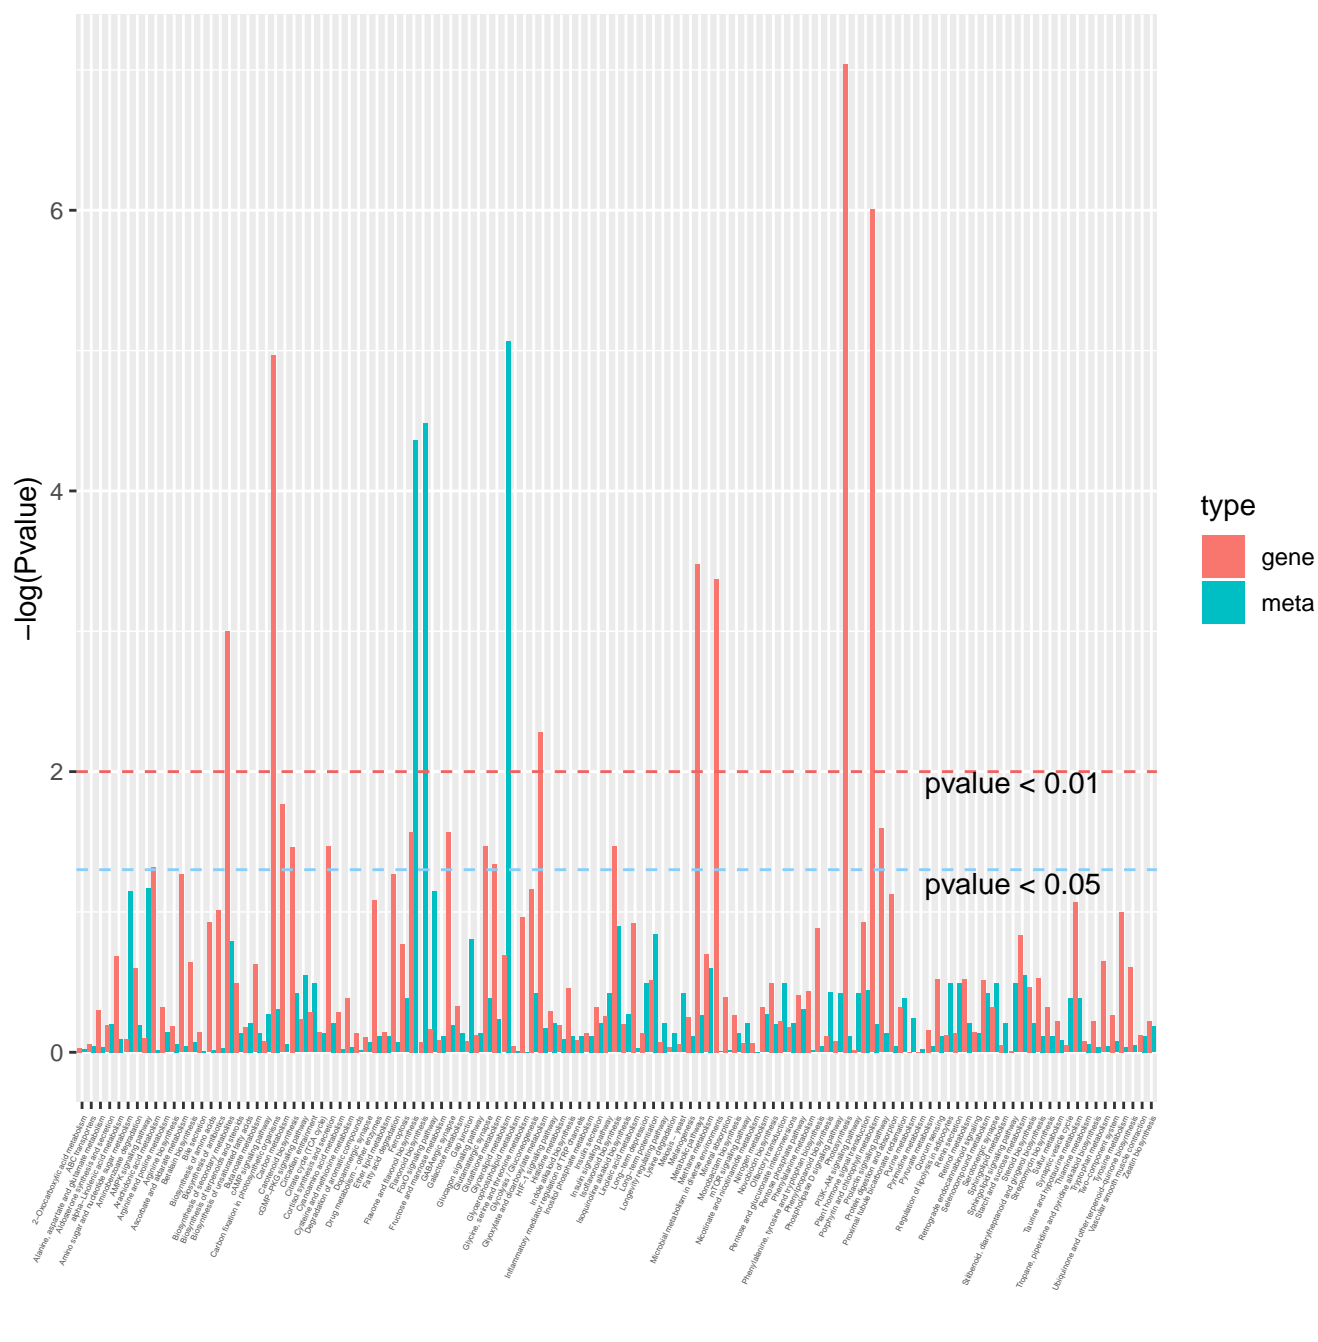

Supplement: s1 [file s1]
